# Supplementary material for: Novel photochromic system using methylene blue reduction with l-ascorbic acid
Source: Royal Society of Chemistry journal article supplement (doi:10.1039/d4ra07408d), 2024-01-01
Supplement: d4ra07408d1.pdf [file d4ra07408d1.pdf]

### S1. Effect of Light Intensity on Color

A 600-lux blue-violet LED light was used in this experiment. A lower maximum absorbance was recorded when the intensity of the light was reduced by a factor of ten (i.e., to 60 lux).

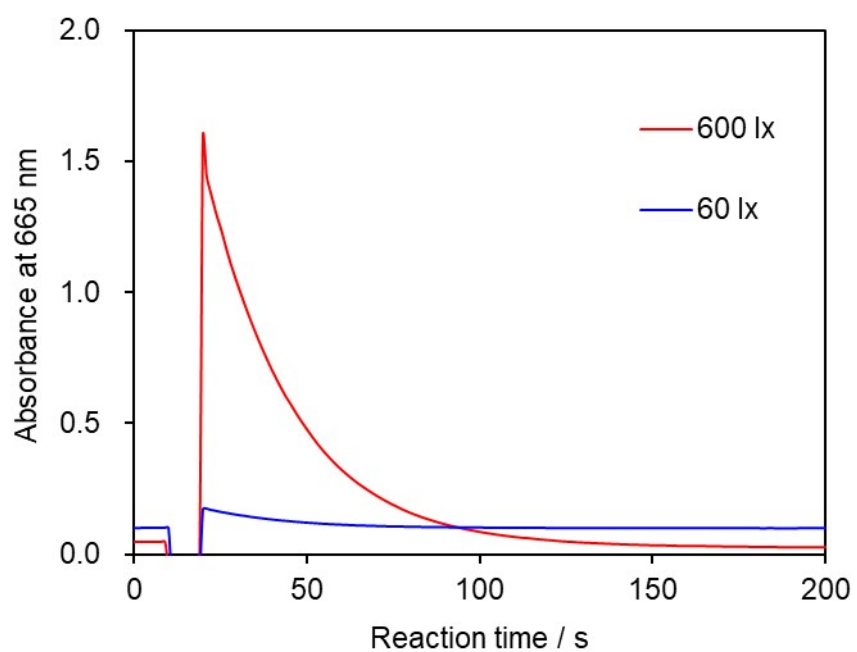

**Fig. S1** Time-dependent changes in absorbance when the reaction solution was irradiated at different illuminances.

## S2. Sensitivity of the Reaction Solution to Ambient Light (Light from a Fluorescent and a White LED Lamp)

Absorbances were measured when the reaction solution was exposed to light from a fluorescent lamp and a white LED lamp at a distance of 5 cm from the liquid surface.

No solution coloring was observed.

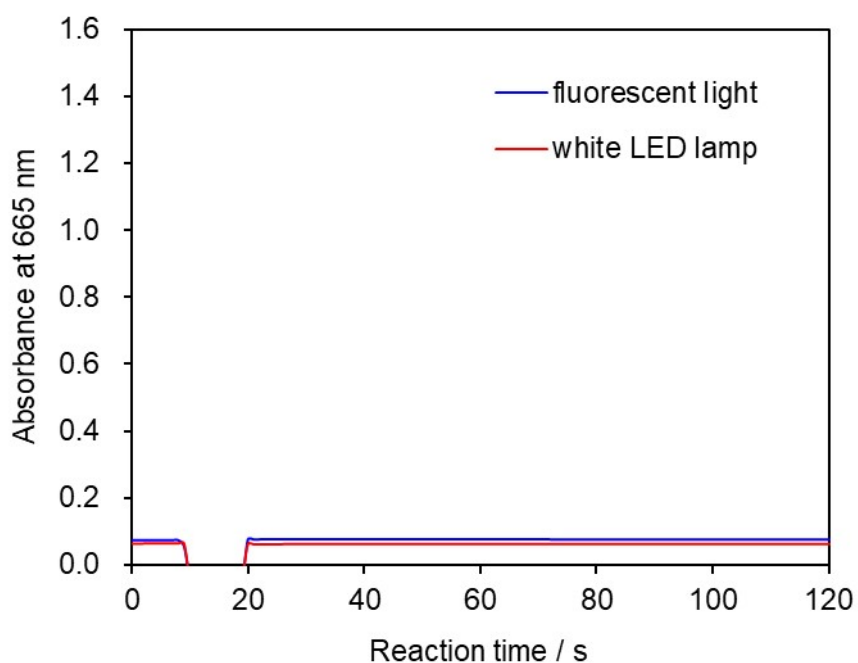

**Fig. S2** Time-dependent changes in absorbance when exposed to fluorescent light and white light from an LED lamp.

### S3. Reaction of solutions in blue bottle experiment with oxygen and blue-violet light

□

The solution for the blue bottle experiment was prepared by mixing 5.0 g of sodium hydroxide, 5.0 g of glucose, and 0.01 g of methylene blue in 250 mL of water according to Campbell's method, which was reported in 1963. The solution was colorless in a static state. When the solution was shaken or exposed to air or oxygen, the leucomethylene blue became oxidized, resulting in a blue color. However, irradiation with blue-violet light (405 nm) or ultraviolet light (365 nm) in the leucomethylene blue state did not color the solution.

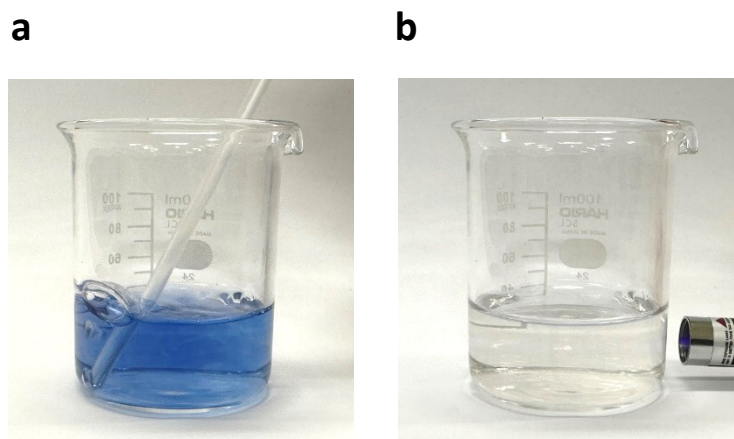

**Fig. S3** □ Solution change in the blue bottle experiment. (a) Oxygen injection and (b) irradiation with blue-violet light (405 nm).
